# Supplementary material for: Protective Effects of Whey Protein Hydrolysate, Treadmill Exercise, and Their Combination Against Scopolamine-induced Cognitive Deficit in Mice
Source: Preprints.org preprint supplement (doi:10.20944/preprints202311.0830.v1), 2023-11-13
Supplement: Supplementary file 1 [file supplementary]

**Supplementary Material**

**Supplementary Fig. S1. Effect of WPH and treadmill exercise on gut microbiome diversity**.NOR, normal; CON, control; EXR, exercise; WPH-L/H, low-dose/high-dose whey protein hydrolysate; EWPH_L/H, exercise + low-dose/high-dose whey protein hydrolysate

**Supplementary Fig. S2. Effect of WPH and treadmill exercise on the gut microbiome composition at the (A) class, (B) order, and (C) family level**. NOR, normal; CON, control; EXR, exercise; WPH-L/H, low-dose/high-dose whey protein hydrolysate; EWPH_L/H, exercise + low-dose/high-dose whey protein hydrolysate.
